# Supplementary material for: Metaviromics of Namib Desert Salt Pans: A Novel Lineage of Haloarchaeal Salterproviruses and a Rich Source of ssDNA Viruses
Source: MDPI journal article supplement (doi:10.3390/v8010014), 2016-01-08
Supplement: s1 [file s1]

# Supplementary Materials: Metaviromics of Namib Desert Salt Pans: A Novel Lineage of Haloarchaeal Salterproviruses and a Rich Source of ssDNA Viruses

Evelien M Adriaenssens <sup>1,\*</sup>, Leonardo Joaquim van Zyl <sup>2</sup>, Don A Cowan <sup>1</sup> and Marla I Trindade <sup>2</sup>

**Table S2.** Read mapping results for the Namib Saline metaviromes (Gobabeb and Swakopmund Saline) to other publically available metaviromes.

| Metavirome                      | Biome       | Number of Reads | Sequencing Platform | Reference               | Metavirome Reads Mapped against GS Contigs | GS Reads Mapped against Metaviromes | Metavirome Reads Mapped against SS Contigs | SS Reads Mapped against Metaviromes |
|---------------------------------|-------------|-----------------|---------------------|-------------------------|--------------------------------------------|-------------------------------------|--------------------------------------------|-------------------------------------|
| GS reads                        | Saline      | 15,207,796      | Illumina            | This study              | 14,098,128                                 | ND                                  | 8,767,600                                  | ND                                  |
| SS reads                        | Saline      | 15,833,257      | Illumina            | This study              | 8,220,907                                  | ND                                  | 14,749,408                                 | ND                                  |
| GOM ssDNA                       | Seawater    | 87,274          | 454                 | [43]                    | 0                                          | 179                                 | 2                                          | 111                                 |
| Saanich Inlet ssDNA             | Seawater    | 96,950          | 454                 | [43]                    | 0                                          | 3848                                | 0                                          | ND                                  |
| SOG ssDNA                       | Seawater    | 95,402          | 454                 | [43]                    | 0                                          | 33                                  | 0                                          | ND                                  |
| Antarctic Lake Spring           | Fresh water | 41,322          | 454                 | [81]                    | 0                                          | 23                                  | 0                                          | 0                                   |
| Antarctic Lake Summer           | Fresh water | 38,475          | 454                 | [81]                    | 1                                          | 328                                 | 0                                          | 0                                   |
| Lake Pavin                      | Freshwater  | 649,290         | 454                 | [49]                    | 2                                          | ND                                  | 4                                          | ND                                  |
| Lake Bourget                    | Freshwater  | 593,084         | 454                 | [49]                    | 29                                         | ND                                  | 36                                         | ND                                  |
| Hamdoun                         | Freshwater  | 39,404          | 454                 | [82]                    | 0                                          | 11                                  | 1                                          | 1                                   |
| El Berbera                      | Freshwater  | 75,921          | 454                 | [82]                    | 8                                          | 34                                  | 5                                          | 5                                   |
| Ilij                            | Freshwater  | 62,059          | 454                 | [82]                    | 2                                          | 30                                  | 1                                          | 1                                   |
| Molomhar                        | Freshwater  | 75,709          | 454                 | [82]                    | 3                                          | 20                                  | 0                                          | 0                                   |
| FTR July 2007                   | Freshwater  | 116,107         | 454                 | [83]                    | 0                                          | 4                                   | 0                                          | 0                                   |
| FTR Aug 2007                    | Freshwater  | 96,373          | 454                 | [83]                    | 3                                          | 263                                 | 1                                          | 1                                   |
| FTR Jan 2008                    | Freshwater  | 76,396          | 454                 | [83]                    | 0                                          | 11                                  | 0                                          | 0                                   |
| Lake Michigan 57th Street Beach | Freshwater  | 296,610         | Illumina            | MetaVir Project ID 3305 | 209                                        | 14,684                              | 18                                         | 338                                 |
| Lake Michigan Montrose Beach    | Freshwater  | 295,664         | Illumina            | MetaVir Project ID 3306 | 463                                        | 30,349                              | 34                                         | 358                                 |
| Saltern Low 0704                | Saline      | 268,049         | 454                 | [1]                     | 9                                          | 20                                  | 11                                         | 11                                  |
| Saltern Low 111005              | Saline      | 109,836         | 454                 | [1]                     | 1                                          | 9                                   | 1                                          | 1                                   |

|                                     |                     |         |          |                         |     |         |    |        |
|-------------------------------------|---------------------|---------|----------|-------------------------|-----|---------|----|--------|
| Saltern Low 112805                  | Saline              | 62,363  | 454      | [1]                     | 39  | 6       | 43 | 43     |
| Saltern Medium 111005               | Saline              | 39,348  | 454      | [1]                     | 1   | 0       | 0  | 0      |
| Saltern Medium 112205               | Saline              | 55,142  | 454      | [1]                     | 1   | 2       | 0  | 0      |
| Saltern Medium 111605               | Saline              | 58,319  | 454      | [1]                     | 3   | 2       | 2  | 2      |
| Saltern High 111605                 | Saline              | 151,180 | 454      | [1]                     | 29  | 11      | 1  | 1      |
| Saltern High 120705                 | Saline              | 46,628  | 454      | [1]                     | 7   | 5       | 4  | 4      |
| Saltern High 112805                 | Saline              | 4536    | 454      | [1]                     | 11  | 10      | 7  | 7      |
| Octopus hot spring                  | Hot spring          | 22,272  | Sanger   | [37]                    | 1   | 360     | 0  | 0      |
| Bearpaw hot spring                  | Hot spring          | 8352    | Sanger   | [37]                    | 3   | 486     | 2  | 2      |
| Salton Sea 1 Vir<br>20060823        | Hypersaline         | 50,935  | 454      | MetaVir Project ID 47   | 0   | 0       | 3  | 3      |
| Salton Sea 2 Vir<br>20060823        | Seawater            | 27,689  | 454      | MetaVir Project ID 50   | 0   | 0       | 1  | 1      |
| POV LA26S                           | Seawater            | 165,256 | 454      | [84]                    | 15  | 806     | 0  | 22     |
| Indian Ocean GS108                  | Seawater            | 320,104 | 454      | [59]                    | 132 | 3659    | 44 | 2,240  |
| Human gut subject 1<br>(contigs)    | Host<br>associated  | 3638    | Illumina | [85]                    | ND  | 17      | ND | 12     |
| Human gut all subjects<br>(contigs) | Host-<br>associated | 10,202  | Illumina | [85]                    | ND  | 334     | ND | 2,450  |
| Antarctic Hypolith<br>(contigs)     | Soil-<br>associated | 32,574  | Illumina | [60]                    | ND  | 428,098 | ND | 42,598 |
| Antarctic Open Soil<br>(contigs)    | Soil                | 8442    | Illumina | [60]                    | ND  | 153,397 | ND | 13,520 |
| Namib Hypolith<br>(contigs)         | Soil-<br>associated | 4574    | Illumina | [29]                    | ND  | 263     | ND | 17     |
| Lake Lanier VCJUL1<br>(contigs)     | Freshwater          | 23,132  | Illumina | MetaVir Project ID 2734 | ND  | 73      | ND | 5      |
| Lake Lanier VCSEP2A<br>(contigs)    | Freshwater          | 1767    | Illumina | MetaVir Project ID 2736 | ND  | 0       | ND | 0      |
| Dunk Island (contigs)               | Seawater            | 3210    | 454      | [84]                    | ND  | 6       | ND | 76     |
| Fitzroy Island (contigs)            | Seawater            | 2382    | 454      | [84]                    | ND  | 22      | ND | 106    |
| P2 Saloon (contigs)                 | Saline              | 7302    | Illumina | MetaVir Project ID 1701 | ND  | 112     | ND | 127    |
| P5 Ngallou (contigs)                | Saline              | 3018    | Illumina | MetaVir Project ID 1700 | ND  | 131     | ND | 98     |
| P6 Lake Retba (contigs)             | Saline              | 884     | Illumina | MetaVir Project ID 1702 | ND  | 53      | ND | 0      |
| P7 Ngallou (contigs)                | Saline              | 1312    | Illumina | MetaVir Project ID 1703 | ND  | 17      | ND | 10     |

ND: not determined due to large reference index sizes.

## References

81. López-Bueno, A.; Tamames, J.; Velázquez, D.; Moya, A.; Quesada, A.; Alcamí, A. High diversity of the viral community from an Antarctic lake. *Science* **2009**, *326*, 858–861.
82. Fancello, L.; Trape, S.; Robert, C.; Boyer, M.; Popgeorgiev, N.; Raoult, D.; Desnues, C. Viruses in the desert: A metagenomic survey of viral communities in four perennial ponds of the Mauritanian Sahara. *ISME J.* **2013**, *7*, 359–369.
83. Tseng, C.-H.; Chiang, P.-W.; Shiah, F.-K.; Chen, Y.-L.; Liou, J.-R.; Hsu, T.-C.; Maheswararajah, S.; Saeed, I.; Halgamuge, S.; Tang, S.-L. Microbial and viral metagenomes of a subtropical freshwater reservoir subject to climatic disturbances. *ISME J.* **2013**, *7*, 2374–2386.
84. Hurwitz, B.L.; Sullivan, M.B. The Pacific Ocean Virome (POV): A marine viral metagenomic dataset and associated protein clusters for quantitative viral ecology. *PLoS ONE* **2013**, *8*, e57355.
85. Minot, S.; Wu, G.D.; Lewis, J.D.; Bushman, F.D. Conservation of gene cassettes among diverse viruses of the human gut. *PLoS ONE* **2012**, *7*, e42342.

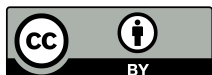

© 2016 by the authors; licensee MDPI, Basel, Switzerland. This article is an open access article distributed under the terms and conditions of the Creative Commons by Attribution (CC-BY) license (<http://creativecommons.org/licenses/by/4.0/>).
